# Supplementary figures and images for: Phylogenetic organization of bacterial activity
Source: PubMed Central journal article supplement — ISME J. 2016 Mar 4;10(9):2336–40. doi: 10.1038/ismej.2016.28 (PMC4989319; doi:10.1038/ismej.2016.28), 2016-03-04

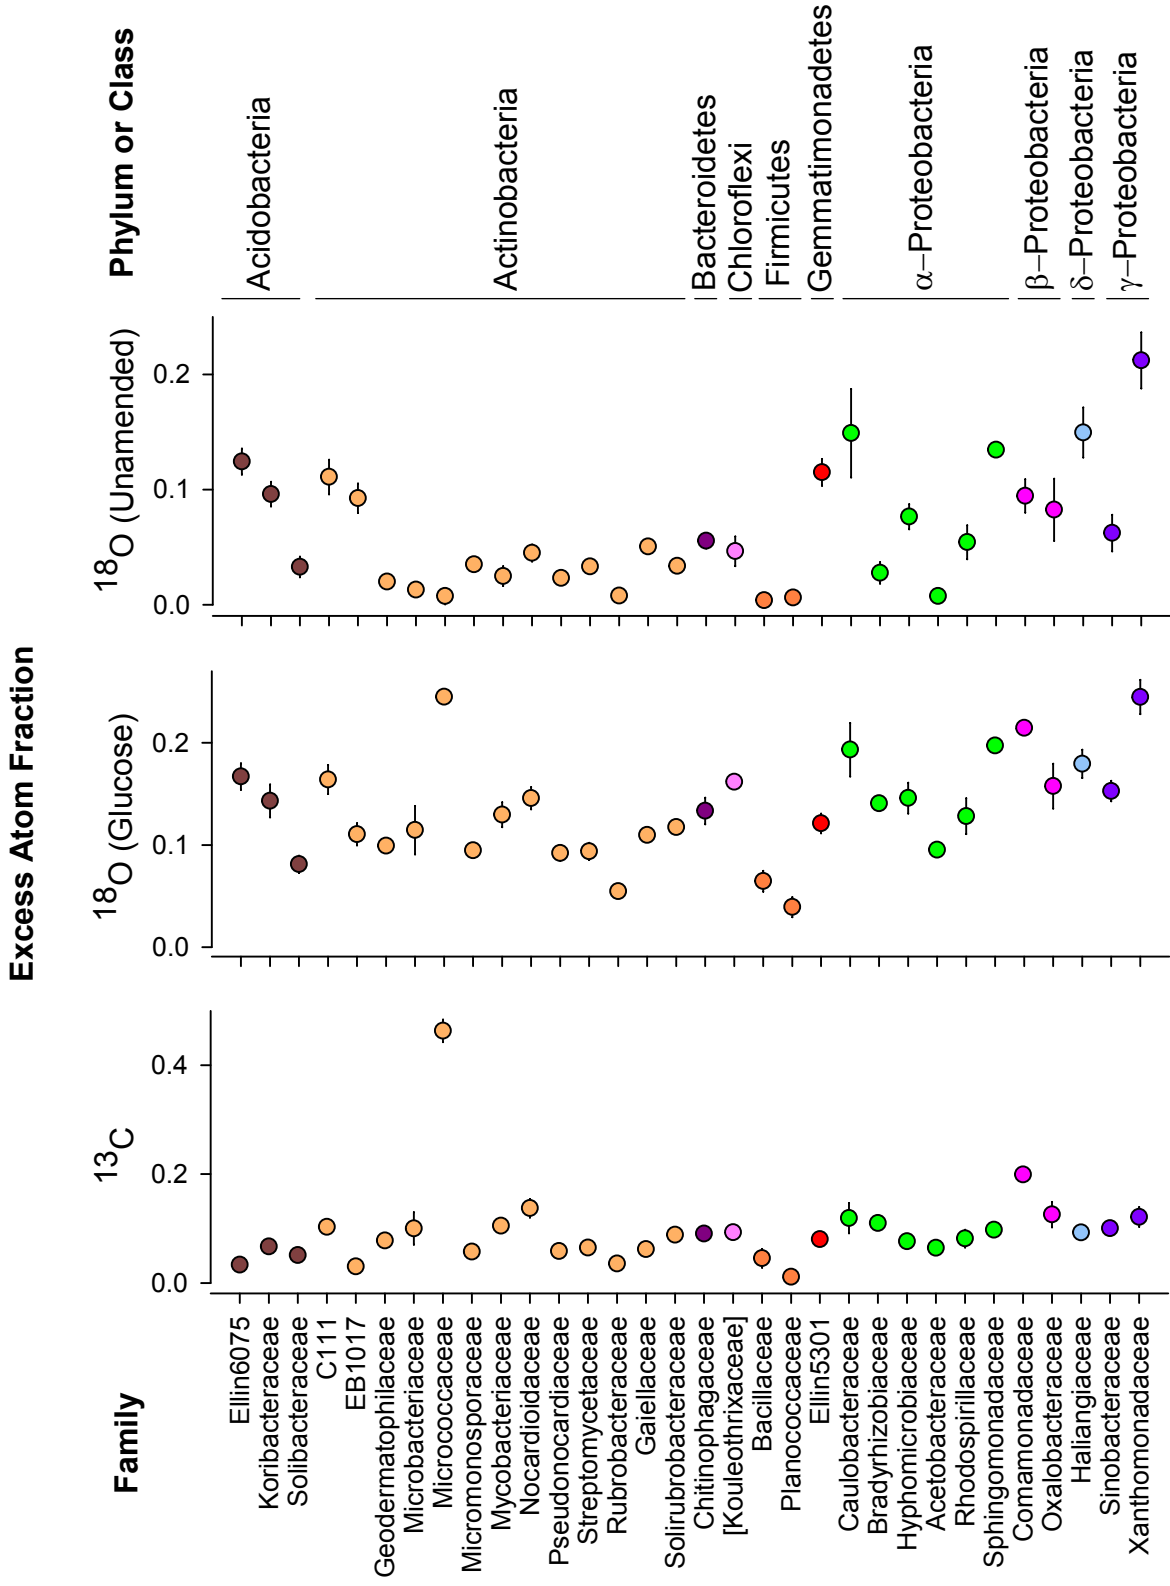

Supplement: ismej201628x1.pdf [file ismej201628x1.pdf]
